# Supplementary material for: An at-home blood collection device for remote immune monitoring by high-parameter flow cytometry
Source: JCI journal article supplement (doi:10.1172/jci.insight.201116), 2026-04-08
Supplement: sd1 [file 1]

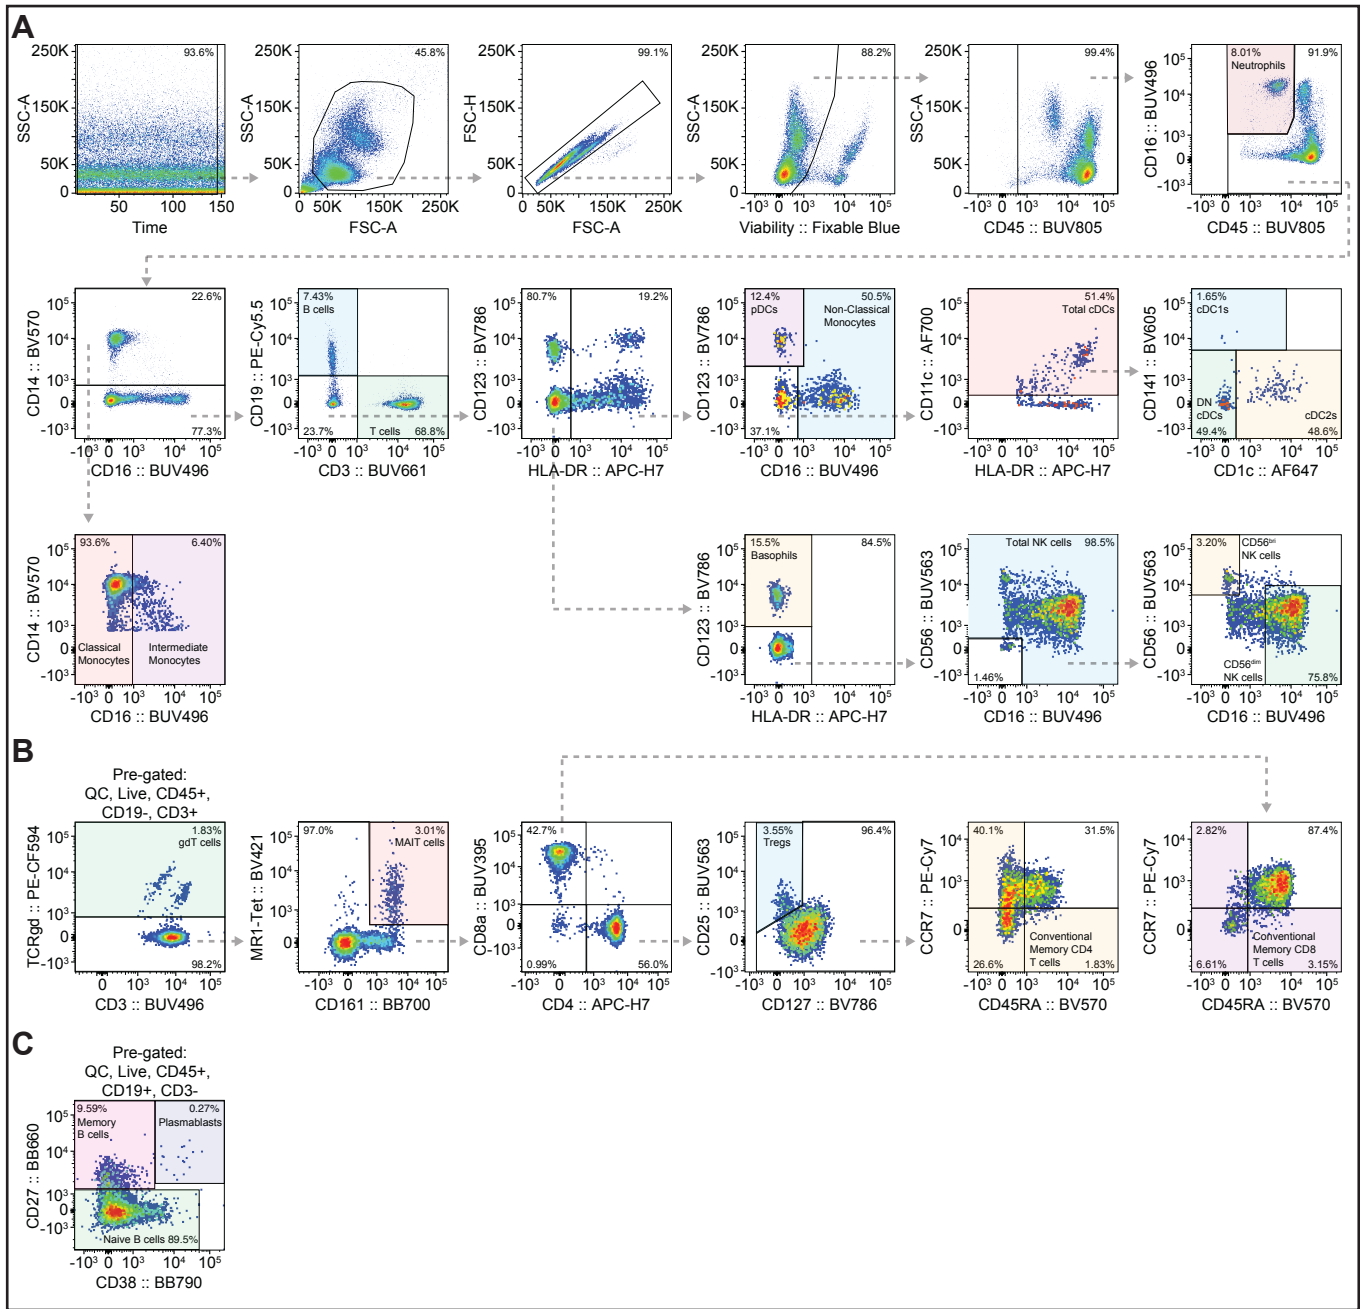

**Supplementary Figure 1: Gating strategy for APC and T cell lineages.**

**A.** Representative plots for lineage gating of cell subsets in the APC panel from a venipuncture ACK lysed whole blood sample. **B.** Representative plots for T cell subsets in the T cell panel from a venipuncture ACK lysed whole blood sample. **C.** Representative plots for B cell subsets in the T cell panel from a venipuncture ACK lysed whole blood sample.

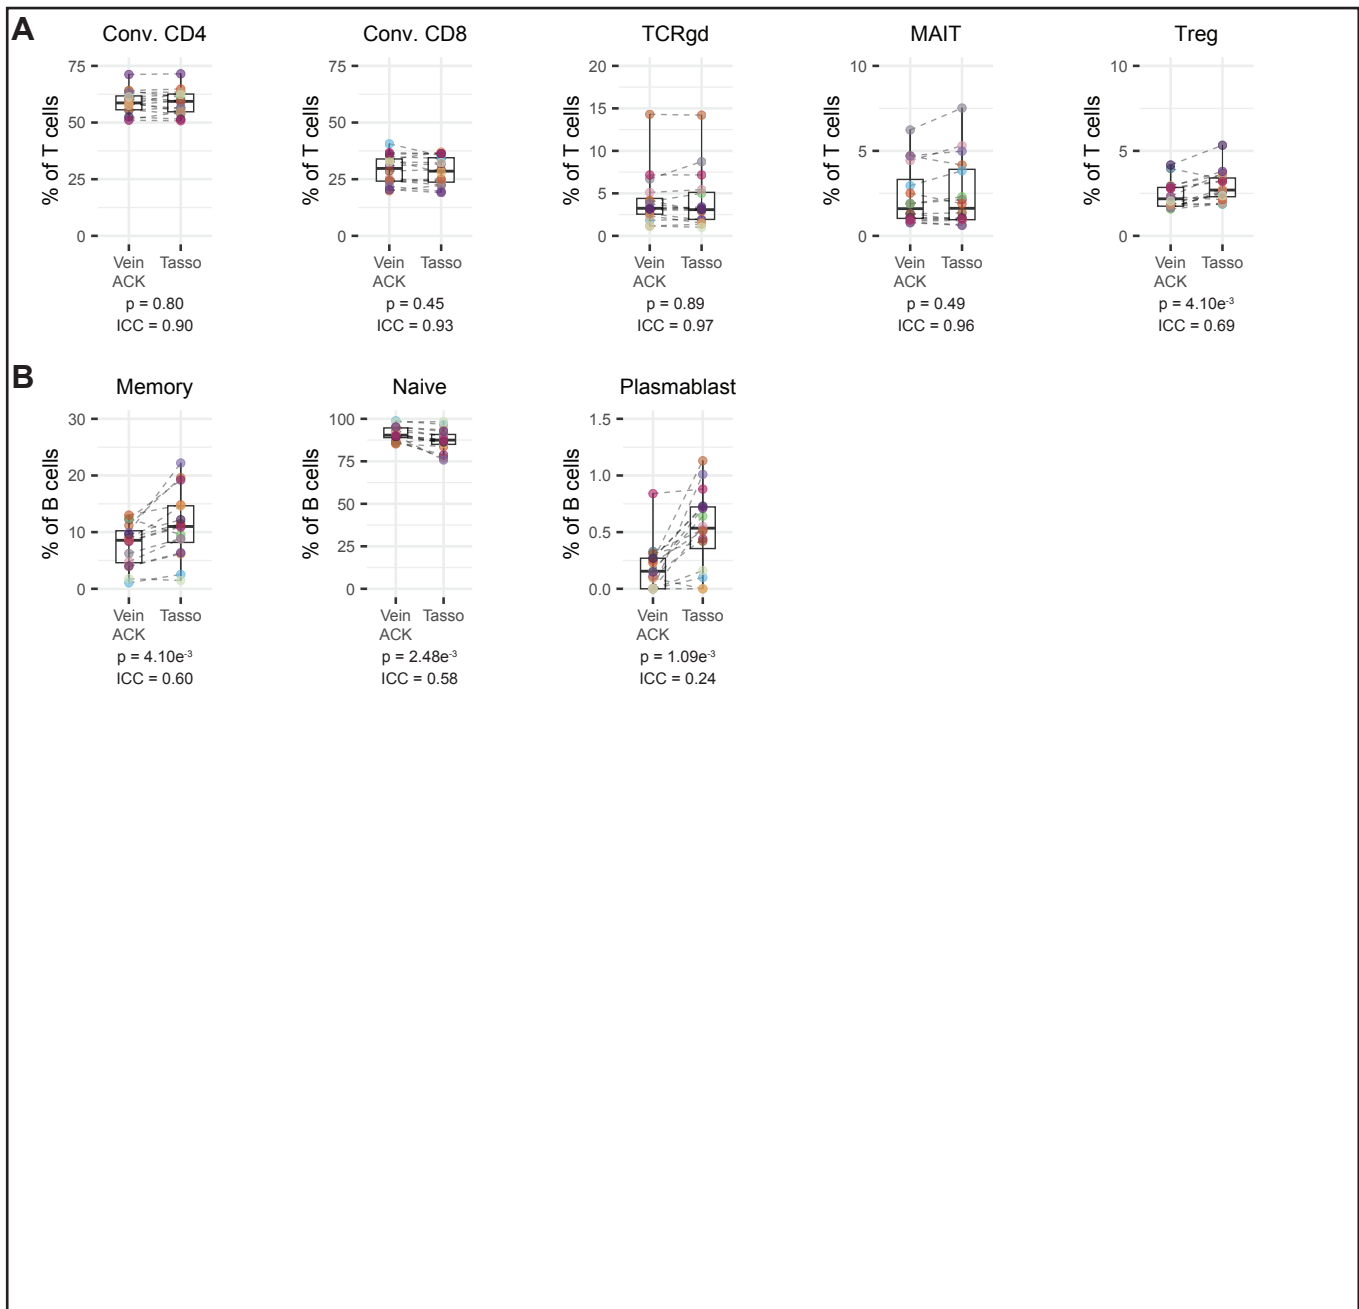

**Supplementary Figure 2: T cells subset distributions in capillary blood and venipuncture are equivalent.**

**A.** Quantification of T cell subsets as a frequency of total T cells comparing venipuncture collected ACK lysed whole blood (Vein ACK) and Tasso+ collected ACK lysed whole blood (Tasso) (n=16). **B.** Quantification of B cell subsets as a frequency of total B cells comparing venipuncture collected ACK lysed whole blood (Vein ACK) and Tasso+ collected ACK lysed whole blood (Tasso) (n=16). Data shown are from 2 independent experiments. Statistical analyses were performed using Wilcoxon signed-rank test and Intraclass Correlation Coefficient.

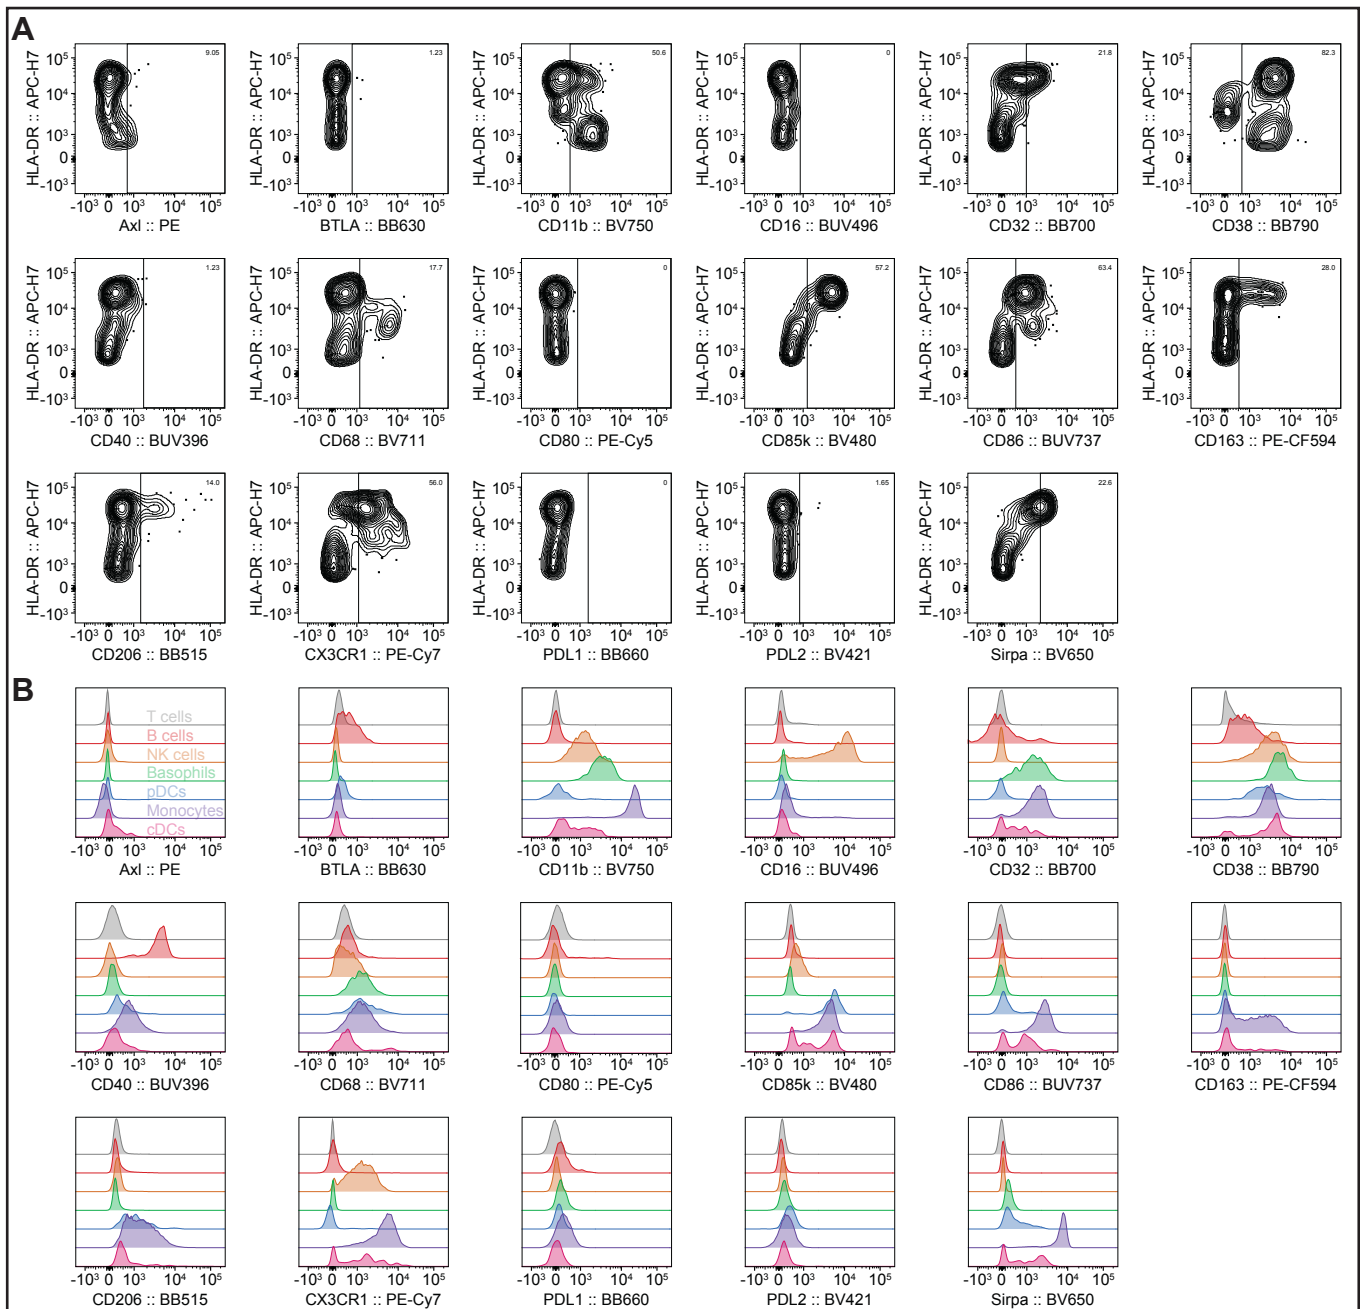

**Supplementary Figure 3: Gating strategy for APC panel phenotyping.**

**A.** Example staining of all phenotyping markers in the APC panel on cDCs from venipuncture collected ACK lysed whole blood. The same positive gate thresholds were used for all cell subsets and all biological samples. **B.** Example staining for all phenotyping markers for all cell subsets in the APC panel; T cells (grey), B cells (red), NK cells (orange), basophils (green), pDCs (blue), monocytes (purple), and cDCs (pink).

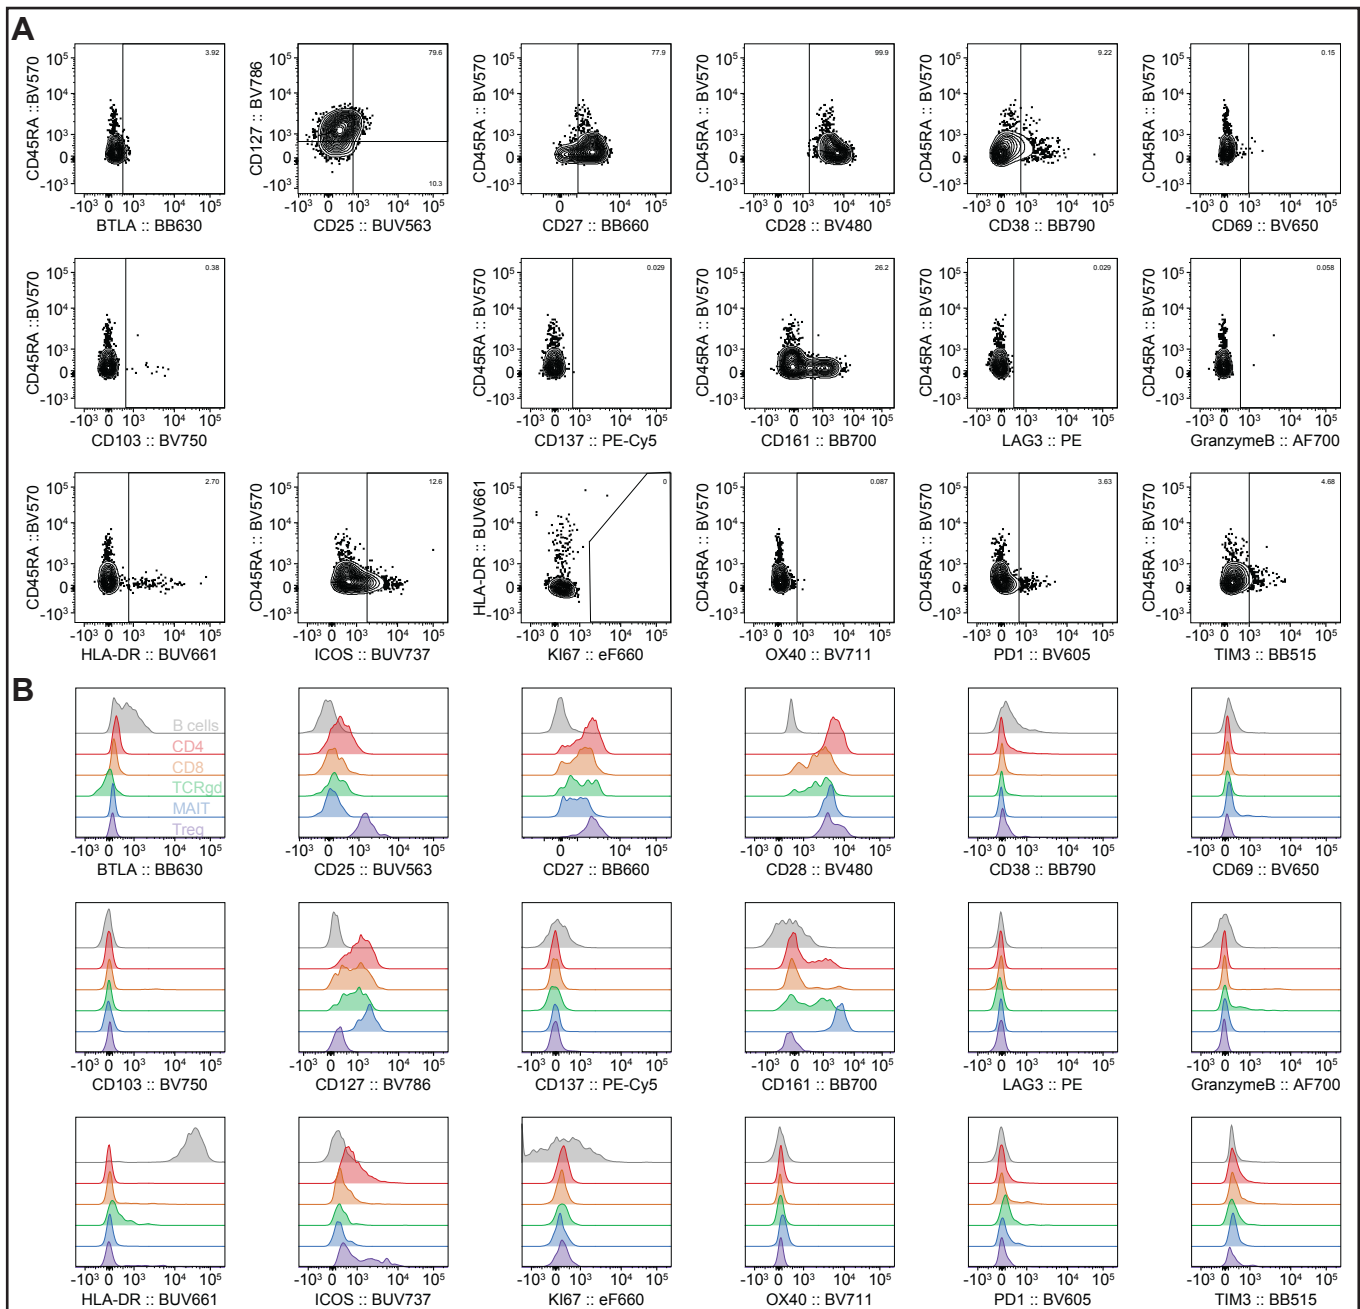

**Supplementary Figure 4: Gating strategy for T cell panel phenotyping.**

**A.** Example staining of all phenotyping markers in the T cell panel on memory conventional CD4 T cells from venipuncture collected ACK lysed whole blood. The same positive gate thresholds were used for all cell subsets and all biological samples. **B.** Example staining for all phenotyping markers for all cell subsets in the T cell panel; B cells (grey), memory conventional CD4 T cells (red), memory conventional CD8 T cells (orange), TCRgd T cells (green), MAIT cells (blue), and Treg cells (purple).

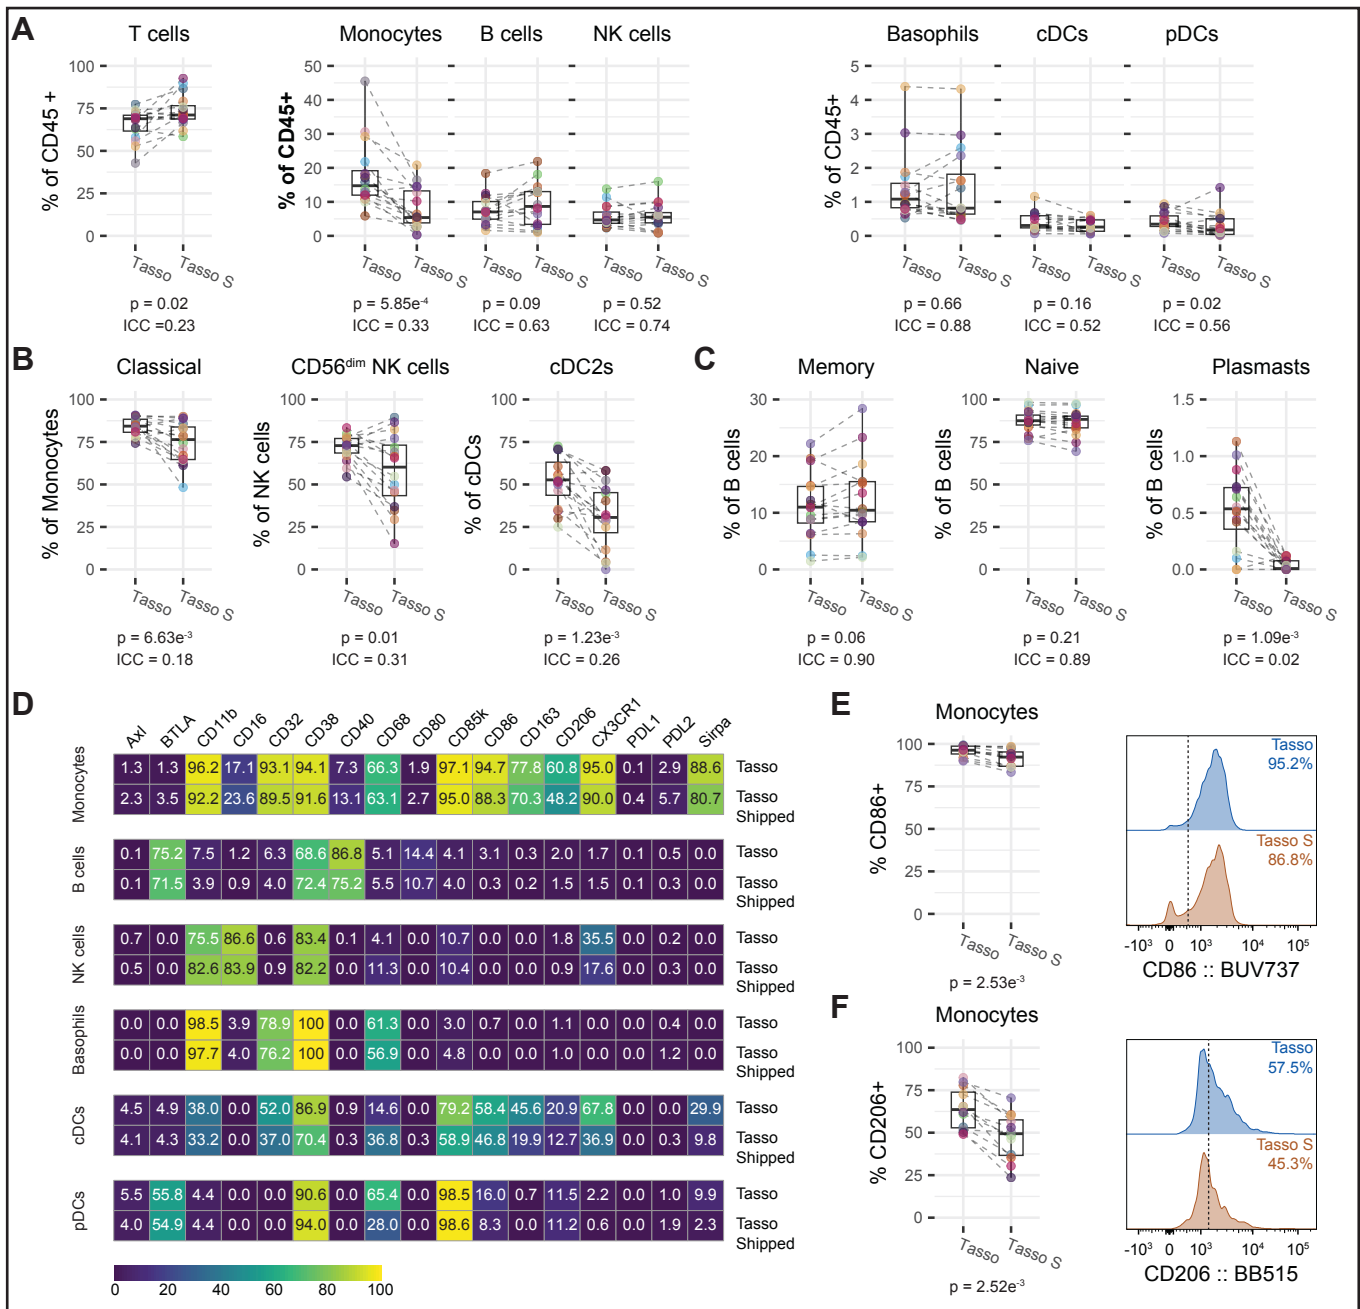

**Supplementary Figure 5: Myeloid cell numbers prevent accurate phenotyping with low blood volume.**

**A.** Quantification of major immune cell subsets frequencies out of CD45+, non-neutrophils comparing Tasso+ collected ACK lysed whole blood drawn at the center and processed immediately (Tasso) and Tasso+ collected ACK lysed whole blood drawn at home and shipped to the center (Tasso S) (n=16). **B.** Quantification of classical monocytes as a frequency of monocytes, CD56dim NK cells as a frequency of NK cells, and cDC2s as a frequency of cDCs (n=16). **C.** Quantification of memory, naive, and plasmablasts as a frequency of total B cells (n=16). **D-F.** High quality samples were used for phenotyping analysis: samples with greater than 70% viability, samples where the transit time of the shipped Tasso+ sample was less than 48 hours, and subsets where there were 20 or more cells. Monocytes (n=12), B cells (n=12), NK cells (n=12), basophils (n=12), cDCs (n=8), and pDCs (n=7). **D.** Heatmap reporting the medians of phenotyping markers for cells defined by the APC panel comparing Tasso and Tasso S samples. **E&F.** Quantification and representative plots of CD86 (**E**) and CD206 (**F**) for monocytes (n=12). Data shown are from 2 independent experiments. Statistical analyses were performed using Wilcoxon signed-rank test and Intra-class Correlation Coefficient.

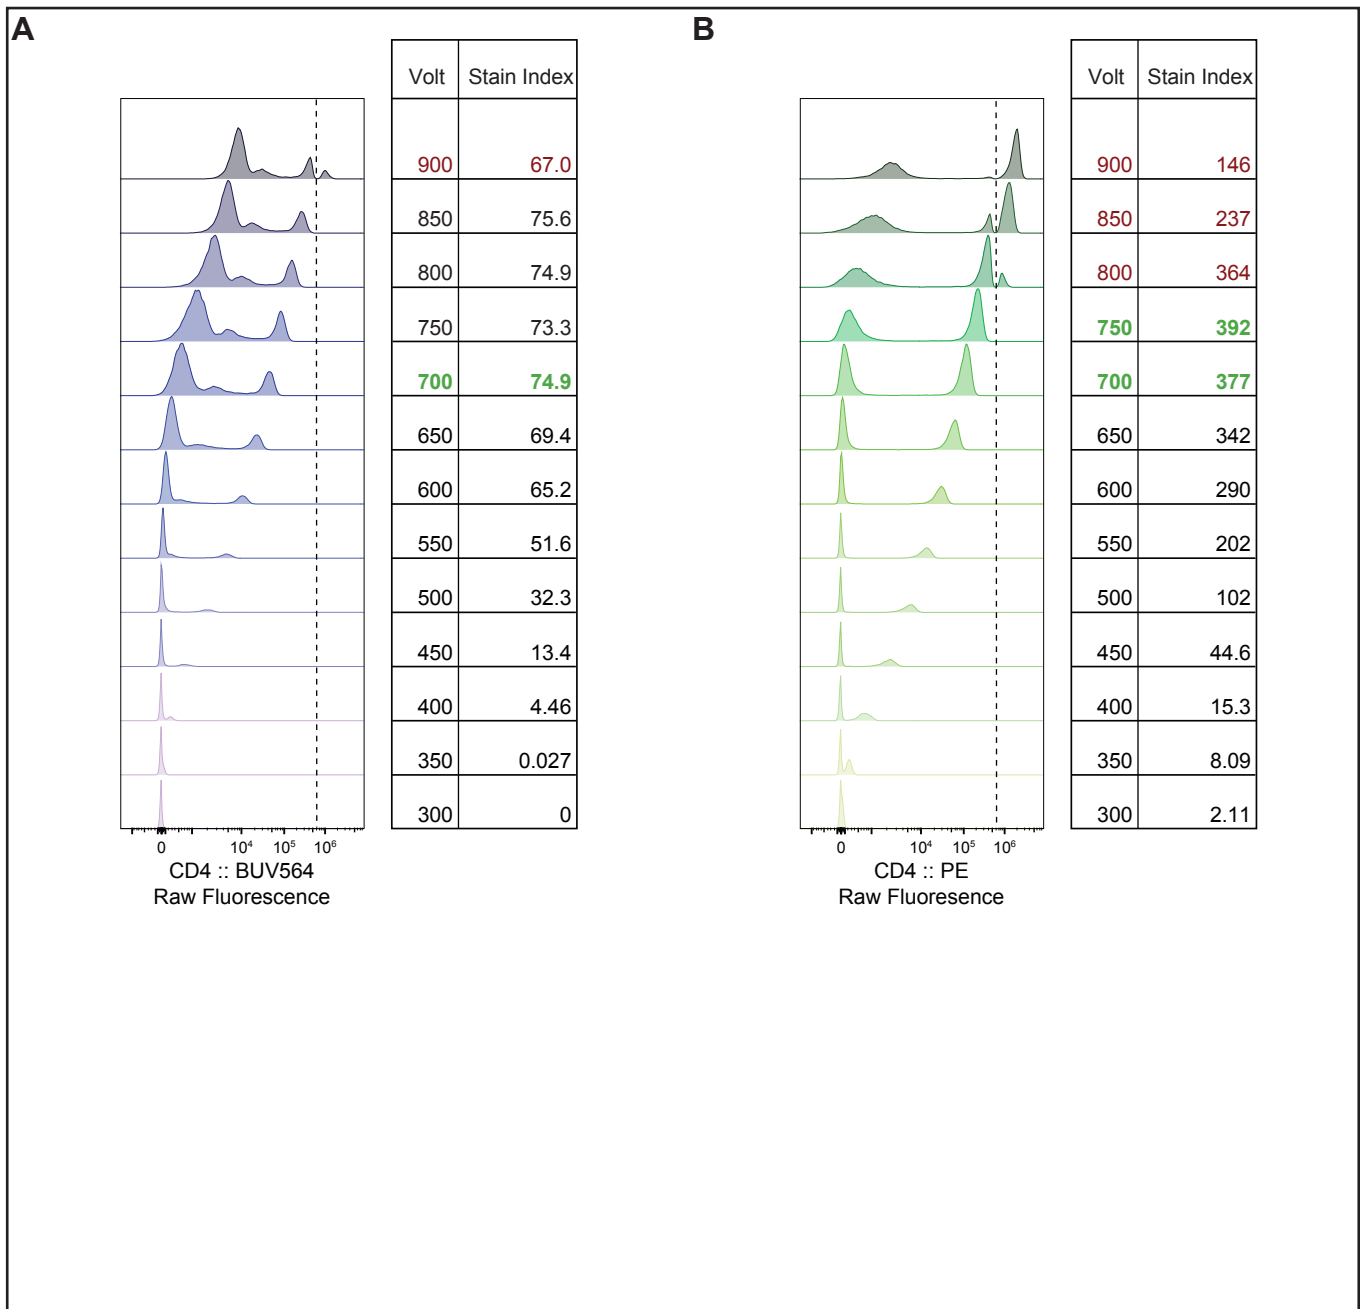

**Supplementary Figure 6: Example of a voltage titration.**

**A&B.** Histogram of uncompensated fluorescence of lymphocyte gated PBMC single stain CD4 on BUV563 (**A**) and PE (**B**) collected over voltage gains from 300 to 900 at 50-volt increments. Dotted line indicates where detector is off scale. Green text indicates an optimal voltage setting in regards to stain index.

**Supplementary Table 1**  
Flow cytometry panels used

**Panel 1: T cell Panel**

|    | Laser  | Bandpass Filter | Fluorophore       | Antigen           | Clone      | Vendor            | Cat        | Mix           | Dilution |
|----|--------|-----------------|-------------------|-------------------|------------|-------------------|------------|---------------|----------|
| 1  | 355 nm | 379/28          | BUV395            | CD8               | RPA-T8     | BD Bioscience     | 563795     | Surface       | 1: 80    |
| 2  | 65 mW  | 450/50          | UV Blue Live/Dead | Amine Reactive    | -          | Invitrogen        | L34962     | Live/Dead     | 1: 500   |
| 3  |        | 515/30          | BUV496            | CD3               | UCHT1      | BD Bioscience     | 612940     | Surface       | 1: 40    |
| 4  |        | 585/30          | BUV563            | CD25              | 2A3        | BD Bioscience     | 612918     | Surface       | 1: 40    |
|    |        | 610/20          | -                 | -                 | -          | -                 | -          | -             | -        |
| 5  |        | 670/30          | BUV661            | HLA-DR            | G46-6      | BD Bioscience     | 565073     | Surface       | 1: 80    |
| 6  |        | 740/35          | BUV737            | ICOS              | DX29       | BD Bioscience     | 749665     | Surface       | 1: 10    |
| 7  |        | 820/60          | BUV805            | CD45              | HI30       | BD Bioscience     | 612891     | Surface       | 1: 80    |
| 8  | 406 nm | 431/28          | BV421             | MR1-Tet (5-OP-RU) | -          | NIH Tetramer Core | -          | Pre-Surface   | 1: 500   |
| 9  | 200 mW | 525/50          | BV480             | CD28              | CD28.2     | BD Bioscience     | 566110     | Surface       | 1: 40    |
| 10 |        | 586/15          | BV570             | CD45RA            | HI100      | BioLegend         | 304132     | Surface       | 1: 160   |
| 11 |        | 610/20          | BV605             | PD1               | EH12.1     | BD Bioscience     | 563245     | Surface       | 1: 20    |
| 12 |        | 670/30          | BV650             | CD69              | FN50       | BD Bioscience     | 563835     | Surface       | 1: 20    |
| 13 |        | 710/50          | BV711             | OX40              | ACT35      | BD Bioscience     | 563664     | Surface       | 1: 40    |
| 14 |        | 750/30          | BV750             | CD103             | Ber-ACT8   | BD Bioscience     | 747099     | Surface       | 1: 160   |
| 15 |        | 780/60          | BV786             | CD127             | HIL-7R-M21 | BD Bioscience     | 563324     | Surface       | 1: 10    |
|    | 488 nm | 488/10          | SSC               | -                 | -          | -                 | -          | -             | -        |
| 16 | 200 mW | 515/20          | BB515             | TIM3              | 7D3        | BD Bioscience     | 565568     | Surface       | 1: 80    |
| 17 |        | 610/20          | BB630             | BTLA              | J168-540   | BD Bioscience     | 2284103    | Surface       | 1: 80    |
| 18 |        | 670/30          | BB660             | CD27              | M-T271     | BD Bioscience     | 624295     | Surface       | 1: 160   |
| 19 |        | 710/50          | BB700             | CD161             | DX12       | BD Bioscience     | 745791     | Surface       | 1: 20    |
|    |        | 750/30          | -                 | -                 | -          | -                 | -          | -             | -        |
| 20 |        | 780/60          | BB790             | CD38              | HIT2       | BD Bioscience     | 624296     | Surface       | 1: 160   |
| 21 | 552 nm | 586/15          | PE                | CD223             | T47-530    | BD Bioscience     | 565616     | Surface       | 1: 20    |
| 22 | 150 mW | 610/20          | PE-CF594          | TCR $\alpha$      | B1         | BD Bioscience     | 562511     | Pre-Surface   | 1: 20    |
| 23 |        | 670/30          | PE-Cy5            | CD137             | 4B4-1      | BD Bioscience     | 551137     | Surface       | 1: 20    |
| 24 |        | 710/50          | PE-Cy5.5          | CD19              | SJ25-C1    | Invitrogen        | MHCD1918   | Surface       | 1: 160   |
| 25 |        | 780/60          | PE-Cy7            | CCR7              | 3D12       | BD Bioscience     | 557648     | Surface       | 1: 40    |
| 26 | 628 nm | 670/30          | eF660             | KI67              | SoIA15     | Invitrogen        | 50-5698-82 | Intracellular | 1: 500   |
| 27 | 200 mW | 710/50          | AF700             | Granzyme B        | GB11       | BD Bioscience     | 560213     | Intracellular | 1: 80    |
| 28 |        | 780/60          | APC-H7            | CD4               | RPA-T4     | BD Bioscience     | 560158     | Surface       | 1: 80    |

**Panel 2: APC Panel**

|     | Laser  | Bandpass Filter | Fluorophore       | Antigen        | Clone    | Vendor        | Cat      | Mix           | Dilution |
|-----|--------|-----------------|-------------------|----------------|----------|---------------|----------|---------------|----------|
| 1   | 355 nm | 379/28          | BUV395            | CD40           | 5C3      | BD Bioscience | 565202   | Surface       | 1: 40    |
| 2   | 65 mW  | 450/50          | UV Blue Live/Dead | Amine Reactive | -        | Invitrogen    | L34962   | Live/Dead     | 1: 500   |
| 3   |        | 515/30          | BUV496            | CD16           | 3G8      | BD Bioscience | 612944   | Surface       | 1: 160   |
| 4   |        | 585/30          | BUV563            | CD56           | NCAM16.2 | BD Bioscience | 612928   | Surface       | 1: 160   |
|     |        | 610/20          | -                 | -              | -        | -             | -        | -             | -        |
| 5   |        | 670/30          | BUV661            | CD3            | UCHT1    | BD Bioscience | 612964   | Surface       | 1: 80    |
| 6   |        | 740/35          | BUV737            | CD86           | FUN-1    | BD Bioscience | 612785   | Surface       | 1: 40    |
| 7   |        | 820/60          | BUV805            | CD45           | HI30     | BD Bioscience | 612891   | Surface       | 1: 80    |
| 8   | 406 nm | 431/28          | BV421             | PD-L2          | MIH18    | BD Bioscience | 563842   | Surface       | 1: 20    |
| 9   | 200 mW | 525/50          | BV480             | CD85k          | ZM3.8    | BD Bioscience | 746718   | Surface       | 1: 40    |
| 10  |        | 586/15          | BV570             | CD14           | M5E2     | BioLegend     | 301832   | Surface       | 1: 20    |
| 11  |        | 610/20          | BV605             | CD141          | 1A4      | BD Bioscience | 740421   | Surface       | 1: 640   |
| 12  |        | 670/30          | BV650             | Sirpa          | SE5A5    | BD Bioscience | 743565   | Surface       | 1: 160   |
| 13  |        | 710/50          | BV711             | CD68           | Y1/82A   | BD Bioscience | 565594   | Intracellular | 1: 40    |
| 14  |        | 750/30          | BV750             | CD11b          | ICRF44   | BD Bioscience | 747357   | Surface       | 1: 80    |
| 15  |        | 780/60          | BV786             | CD123          | 7G3      | BD Bioscience | 564196   | Surface       | 1: 40    |
|     | 488 nm | 488/10          | SSC               | -              | -        | -             | -        | -             | -        |
| 16  | 200 mW | 515/20          | BB515             | CD206          | 19.2     | BD Bioscience | 564668   | Surface       | 1: 20    |
| 17  |        | 610/20          | BB630             | BTLA           | J168-540 | BD Bioscience | 2284103  | Surface       | 1: 80    |
| 18  |        | 670/30          | BB660             | PD-L1          | MIH1     | BD Bioscience | 624295   | Surface       | 1: 40    |
| 19  |        | 710/50          | BB700             | CD32           | FL18.26  | BD Bioscience | 742216   | Surface       | 1: 160   |
|     |        | 750/30          | -                 | -              | -        | -             | -        | -             | -        |
| 20  |        | 780/60          | BB790             | CD38           | HIT2     | BD Bioscience | 624296   | Surface       | 1: 80    |
| 21  | 552 nm | 586/15          | PE                | Axl            | 108724   | R&D           | FAB154P  | Surface       | 1: 20    |
| *21 | 150 mW | 586/15          | PE                | PDPN           | NC-08    | BioLegend     | 337003   | Surface       | 1: 1280  |
| 22  |        | 610/20          | PE-CF594          | CD163          | GHI/61   | BD Bioscience | 562670   | Surface       | 1: 40    |
| 23  |        | 670/30          | PE-Cy5            | CD80           | L37.4    | BD Bioscience | 559370   | Surface       | 1: 10    |
| 24  |        | 710/50          | PE-Cy5.5          | CD19           | SJ25-C1  | Invitrogen    | MHCD1918 | Surface       | 1: 160   |
| 25  |        | 780/60          | PE-Cy7            | CX3CR1         | 2A9-1    | BioLegend     | 341612   | Pre-Surface   | 1: 160   |
| 26  | 628 nm | 670/30          | AF647             | CD1c           | F10/21A3 | BD Bioscience | 565048   | Surface       | 1: 160   |
| 27  | 200 mW | 710/50          | AF700             | CD11c          | B-Ly6    | BD Bioscience | 561352   | Surface       | 1: 320   |
| 28  |        | 780/60          | APC-H7            | HLA-DR         | G46-6    | BD Bioscience | 561358   | Surface       | 1: 80    |

\*PE-PDPN instead of PE-Axl was used in longitudinal APC panel for only Figure 6.

**Supplementary Table 2**  
Meta data for participant samples

| Donor       | Group             | Draw Date Time       | Received Date Time   | Transit Time | Transit Hours | Transit Days | Transit Days Bin | Min Transit Temp | Max Transit Temp | Mean Transit Temp |
|-------------|-------------------|----------------------|----------------------|--------------|---------------|--------------|------------------|------------------|------------------|-------------------|
| Tasso ID 05 | Vein PBMC         | 2022-09-26T11:39:00Z | NA                   | NA           | NA            | NA           | NA               | NA               | NA               | NA                |
| Tasso ID 05 | Vein ACK          | 2022-09-26T11:39:00Z | NA                   | NA           | NA            | NA           | NA               | NA               | NA               | NA                |
| Tasso ID 05 | Tasso ACK         | 2022-09-26T11:49:00Z | NA                   | NA           | NA            | NA           | NA               | NA               | NA               | NA                |
| Tasso ID 05 | Tasso ACK Shipped | 2022-09-26T16:09:00Z | 2022-09-27T12:00:00Z | 0.83         | 19.85         | 0.83         | 0                | 53               | 77               | 63.50             |
| Tasso ID 06 | Vein PBMC         | 2022-09-19T08:29:00Z | NA                   | NA           | NA            | NA           | NA               | NA               | NA               | NA                |
| Tasso ID 06 | Vein ACK          | 2022-09-19T08:29:00Z | NA                   | NA           | NA            | NA           | NA               | NA               | NA               | NA                |
| Tasso ID 06 | Tasso ACK         | 2022-09-19T08:34:00Z | NA                   | NA           | NA            | NA           | NA               | NA               | NA               | NA                |
| Tasso ID 06 | Tasso ACK Shipped | 2022-09-19T14:30:00Z | 2022-09-21T09:30:00Z | 1.79         | 43            | 1.79         | 1                | 50               | 77               | 63.19             |
| Tasso ID 07 | Vein PBMC         | 2022-09-27T11:20:00Z | NA                   | NA           | NA            | NA           | NA               | NA               | NA               | NA                |
| Tasso ID 07 | Vein ACK          | 2022-09-27T11:20:00Z | NA                   | NA           | NA            | NA           | NA               | NA               | NA               | NA                |
| Tasso ID 07 | Tasso ACK         | 2022-09-27T11:30:00Z | NA                   | NA           | NA            | NA           | NA               | NA               | NA               | NA                |
| Tasso ID 07 | Tasso ACK Shipped | 2022-09-28T11:10:00Z | 2022-10-03T10:00:00Z | 4.95         | 118.83        | 4.95         | 4                | 52               | 77               | 62.21             |
| Tasso ID 08 | Vein PBMC         | 2022-09-20T09:10:00Z | NA                   | NA           | NA            | NA           | NA               | NA               | NA               | NA                |
| Tasso ID 08 | Vein ACK          | 2022-09-20T09:10:00Z | NA                   | NA           | NA            | NA           | NA               | NA               | NA               | NA                |
| Tasso ID 08 | Tasso ACK         | 2022-09-20T09:01:00Z | NA                   | NA           | NA            | NA           | NA               | NA               | NA               | NA                |
| Tasso ID 08 | Tasso ACK Shipped | 2022-09-20T18:01:00Z | 2022-09-26T10:00:00Z | 5.67         | 135.98        | 5.67         | 5                | 50               | 76               | 62.49             |
| Tasso ID 09 | Vein PBMC         | 2022-09-12T08:39:00Z | NA                   | NA           | NA            | NA           | NA               | NA               | NA               | NA                |
| Tasso ID 09 | Vein ACK          | 2022-09-12T08:39:00Z | NA                   | NA           | NA            | NA           | NA               | NA               | NA               | NA                |
| Tasso ID 09 | Tasso ACK         | 2022-09-12T08:46:00Z | NA                   | NA           | NA            | NA           | NA               | NA               | NA               | NA                |
| Tasso ID 09 | Tasso ACK Shipped | 2022-09-12T17:28:00Z | 2022-09-13T11:30:00Z | 0.75         | 18.03         | 0.75         | 0                | 62               | 70               | 64.61             |
| Tasso ID 10 | Vein PBMC         | 2022-09-19T09:23:00Z | NA                   | NA           | NA            | NA           | NA               | NA               | NA               | NA                |
| Tasso ID 10 | Vein ACK          | 2022-09-19T09:23:00Z | NA                   | NA           | NA            | NA           | NA               | NA               | NA               | NA                |
| Tasso ID 10 | Tasso ACK         | 2022-09-19T09:28:00Z | NA                   | NA           | NA            | NA           | NA               | NA               | NA               | NA                |
| Tasso ID 10 | Tasso ACK Shipped | 2022-09-19T17:30:00Z | 2022-09-21T09:30:00Z | 1.67         | 40            | 1.67         | 1                | 50               | 77               | 62.43             |
| Tasso ID 11 | Vein PBMC         | 2022-09-06T08:03:00Z | NA                   | NA           | NA            | NA           | NA               | NA               | NA               | NA                |
| Tasso ID 11 | Vein ACK          | 2022-09-06T08:03:00Z | NA                   | NA           | NA            | NA           | NA               | NA               | NA               | NA                |
| Tasso ID 11 | Tasso ACK         | 2022-09-06T08:09:00Z | NA                   | NA           | NA            | NA           | NA               | NA               | NA               | NA                |
| Tasso ID 11 | Tasso ACK Shipped | 2022-09-06T17:17:00Z | 2022-09-09T11:00:00Z | 2.74         | 65.72         | 2.74         | 2                | 52               | 76               | 64.21             |
| Tasso ID 12 | Vein PBMC         | 2022-09-26T11:53:00Z | NA                   | NA           | NA            | NA           | NA               | NA               | NA               | NA                |
| Tasso ID 12 | Vein ACK          | 2022-09-26T11:53:00Z | NA                   | NA           | NA            | NA           | NA               | NA               | NA               | NA                |
| Tasso ID 12 | Tasso ACK         | 2022-09-26T12:07:00Z | NA                   | NA           | NA            | NA           | NA               | NA               | NA               | NA                |
| Tasso ID 12 | Tasso ACK Shipped | 2022-09-26T19:19:00Z | 2022-09-28T10:00:00Z | 1.61         | 38.68         | 1.61         | 1                | 53               | 77               | 61.40             |
| Tasso ID 13 | Vein PBMC         | 2022-09-12T10:52:00Z | NA                   | NA           | NA            | NA           | NA               | NA               | NA               | NA                |
| Tasso ID 13 | Vein ACK          | 2022-09-12T10:52:00Z | NA                   | NA           | NA            | NA           | NA               | NA               | NA               | NA                |
| Tasso ID 13 | Tasso ACK         | 2022-09-12T10:59:00Z | NA                   | NA           | NA            | NA           | NA               | NA               | NA               | NA                |
| Tasso ID 13 | Tasso ACK Shipped | 2022-09-12T13:31:00Z | 2022-09-14T11:00:00Z | 1.9          | 45.48         | 1.9          | 1                | 62               | 73               | 65.56             |
| Tasso ID 14 | Vein PBMC         | 2022-09-19T11:16:00Z | NA                   | NA           | NA            | NA           | NA               | NA               | NA               | NA                |
| Tasso ID 14 | Vein ACK          | 2022-09-19T11:16:00Z | NA                   | NA           | NA            | NA           | NA               | NA               | NA               | NA                |
| Tasso ID 14 | Tasso ACK         | 2022-09-19T11:23:00Z | NA                   | NA           | NA            | NA           | NA               | NA               | NA               | NA                |
| Tasso ID 14 | Tasso ACK Shipped | 2022-09-19T17:51:00Z | 2022-09-22T10:00:00Z | 2.67         | 64.15         | 2.67         | 2                | 50               | 77               | 63.00             |
| Tasso ID 15 | Vein PBMC         | 2022-09-06T11:03:00Z | NA                   | NA           | NA            | NA           | NA               | NA               | NA               | NA                |
| Tasso ID 15 | Vein ACK          | 2022-09-06T11:03:00Z | NA                   | NA           | NA            | NA           | NA               | NA               | NA               | NA                |
| Tasso ID 15 | Tasso ACK         | 2022-09-06T11:26:00Z | NA                   | NA           | NA            | NA           | NA               | NA               | NA               | NA                |
| Tasso ID 15 | Tasso ACK Shipped | 2022-09-06T16:30:00Z | 2022-09-08T10:21:00Z | 1.74         | 41.85         | 1.74         | 1                | 52               | 76               | 64.95             |
| Tasso ID 17 | Vein PBMC         | 2022-09-20T08:23:00Z | NA                   | NA           | NA            | NA           | NA               | NA               | NA               | NA                |
| Tasso ID 17 | Vein ACK          | 2022-09-20T08:23:00Z | NA                   | NA           | NA            | NA           | NA               | NA               | NA               | NA                |
| Tasso ID 17 | Tasso ACK         | 2022-09-20T08:39:00Z | NA                   | NA           | NA            | NA           | NA               | NA               | NA               | NA                |
| Tasso ID 17 | Tasso ACK Shipped | 2022-09-20T11:40:00Z | 2022-09-21T09:30:00Z | 0.91         | 21.83         | 0.91         | 0                | 50               | 77               | 63.32             |
| Tasso ID 18 | Vein PBMC         | 2022-09-27T08:45:00Z | NA                   | NA           | NA            | NA           | NA               | NA               | NA               | NA                |
| Tasso ID 18 | Vein ACK          | 2022-09-27T08:45:00Z | NA                   | NA           | NA            | NA           | NA               | NA               | NA               | NA                |
| Tasso ID 18 | Tasso ACK         | 2022-09-27T08:53:00Z | NA                   | NA           | NA            | NA           | NA               | NA               | NA               | NA                |
| Tasso ID 18 | Tasso ACK Shipped | 2022-09-27T13:08:00Z | 2022-09-29T10:00:00Z | 1.87         | 44.87         | 1.87         | 1                | 55               | 77               | 60.69             |
| Tasso ID 19 | Vein PBMC         | 2022-09-19T10:00:00Z | NA                   | NA           | NA            | NA           | NA               | NA               | NA               | NA                |
| Tasso ID 19 | Vein ACK          | 2022-09-19T10:00:00Z | NA                   | NA           | NA            | NA           | NA               | NA               | NA               | NA                |
| Tasso ID 19 | Tasso ACK         | 2022-09-19T10:07:00Z | NA                   | NA           | NA            | NA           | NA               | NA               | NA               | NA                |
| Tasso ID 19 | Tasso ACK Shipped | 2022-09-19T13:56:00Z | 2022-09-21T09:30:00Z | 1.82         | 43.57         | 1.82         | 1                | 50               | 77               | 63.19             |
| Tasso ID 20 | Vein PBMC         | 2022-09-20T09:06:00Z | NA                   | NA           | NA            | NA           | NA               | NA               | NA               | NA                |
| Tasso ID 20 | Vein ACK          | 2022-09-20T09:06:00Z | NA                   | NA           | NA            | NA           | NA               | NA               | NA               | NA                |
| Tasso ID 20 | Tasso ACK         | 2022-09-20T09:15:00Z | NA                   | NA           | NA            | NA           | NA               | NA               | NA               | NA                |
| Tasso ID 20 | Tasso ACK Shipped | 2022-09-21T07:30:00Z | 2022-09-22T10:00:00Z | 1.1          | 26.5          | 1.1          | 1                | 55               | 76               | 63.54             |
| Tasso ID 21 | Vein PBMC         | 2022-09-27T10:37:00Z | NA                   | NA           | NA            | NA           | NA               | NA               | NA               | NA                |
| Tasso ID 21 | Vein ACK          | 2022-09-27T10:37:00Z | NA                   | NA           | NA            | NA           | NA               | NA               | NA               | NA                |
| Tasso ID 21 | Tasso ACK         | 2022-09-27T10:45:00Z | NA                   | NA           | NA            | NA           | NA               | NA               | NA               | NA                |
| Tasso ID 21 | Tasso ACK Shipped | 2022-09-27T19:03:00Z | 2022-09-29T10:00:00Z | 1.62         | 38.95         | 1.62         | 1                | 55               | 65               | 59.02             |

### Supplementary Table 3

Meta data for longitudinal replicates

|    | Date of Staining | Date of Acquisition | Biologic Replicate File Name | Rainbow Beads File Name                   |
|----|------------------|---------------------|------------------------------|-------------------------------------------|
| *0 | NA               | 2023-03-08          | NA                           | rainbow beads_2023-03-08 New Lot AP03.fcs |
| 1  | 2023-08-22       | 2023-08-24          | TUM209_BP0323502.fcs         | rainbow beads_2023-08-24 Lot AP03.fcs     |
| 2  | 2023-08-23       | 2023-08-24          | TUM210_BP0323502.fcs         |                                           |
| 3  | 2023-09-11       | 2023-09-13          | TUM212_BP0323502.fcs         | rainbow beads_2023-09-13 Lot AP03.fcs     |
| 4  | 2023-09-12       | 2023-09-13          | TUM213_BP0323502.fcs         |                                           |
| 5  | 2023-10-11       | 2023-10-12          | TUM215_BP0323502.fcs         | rainbow beads_2023-10-12 Lot AP03.fcs     |
| 6  | 2023-10-23       | 2023-10-24          | TUM218_BP0323502.fcs         | rainbow beads_2023-10-24 AP03.fcs         |
| 7  | 2023-11-01       | 2023-11-06          | TUM219_BP0323502.fcs         | rainbow beads_2023-11-06 Lot AP03.fcs     |
| 8  | 2024-01-29       | 2024-01-31          | mfPLAC_BP0323502.fcs         | rainbow beads_2024-01-31 Lot AP03.fcs     |
| 9  | 2024-08-28       | 2024-08-30          | TUM225_BP0323502.fcs         | rainbow beads_2024-08-30 Lot AP03.fcs     |
| 10 | 2025-04-29       | 2025-04-30          | Frozen_BP0323502.fcs         | rainbow beads_2025-04-30 Lot AP03.fcs     |

\* Calibration of rainbow beads lot AP03, no biological samples stained
